# Supplementary material
Source: PubMed Central journal article supplement (PMC8866673)

## a – IgG-N naïve

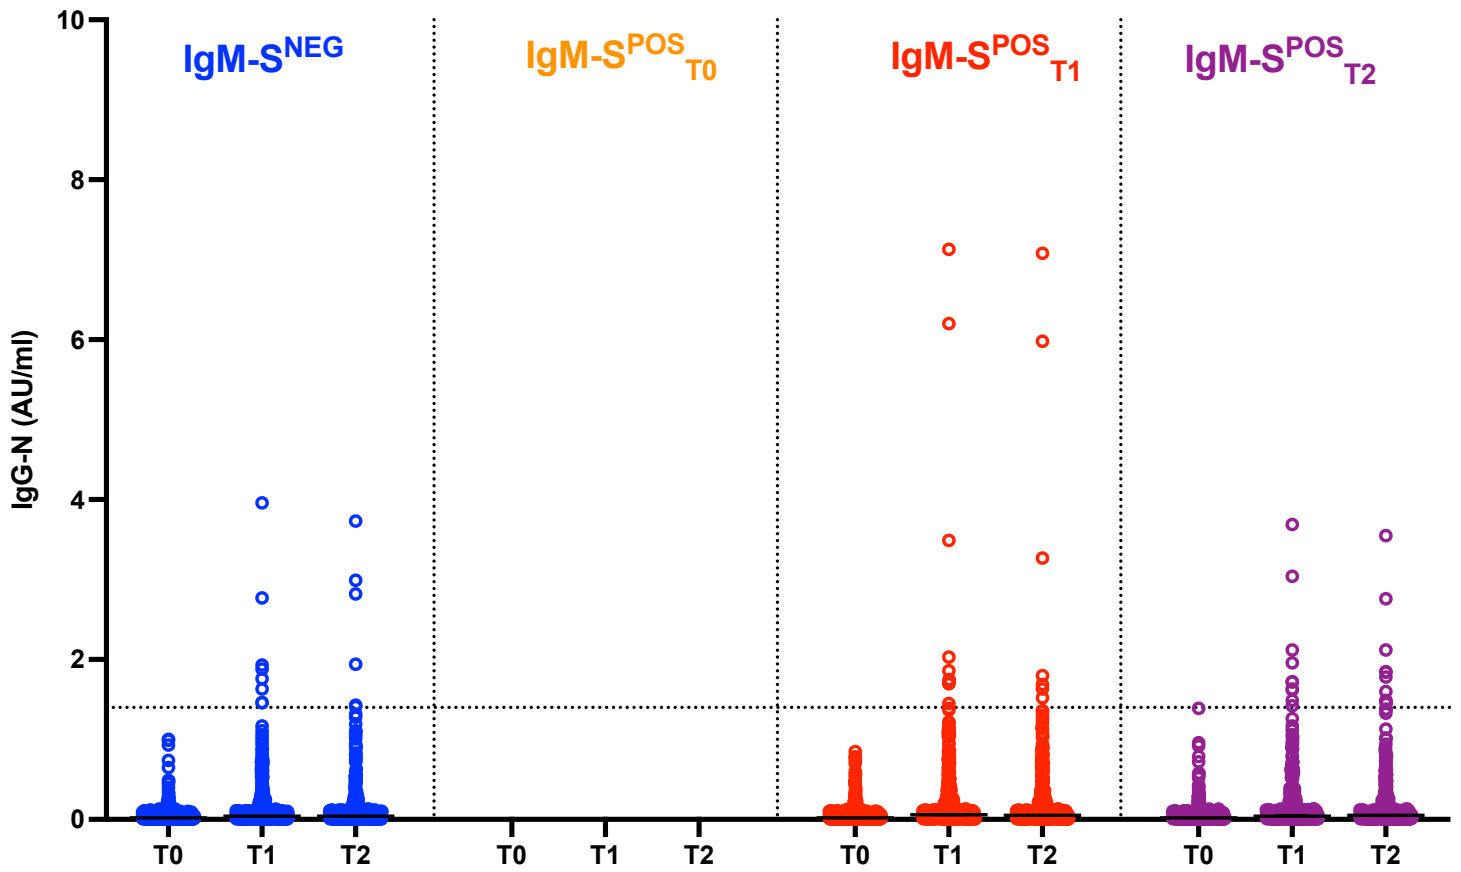

## b – IgG-N previously infected

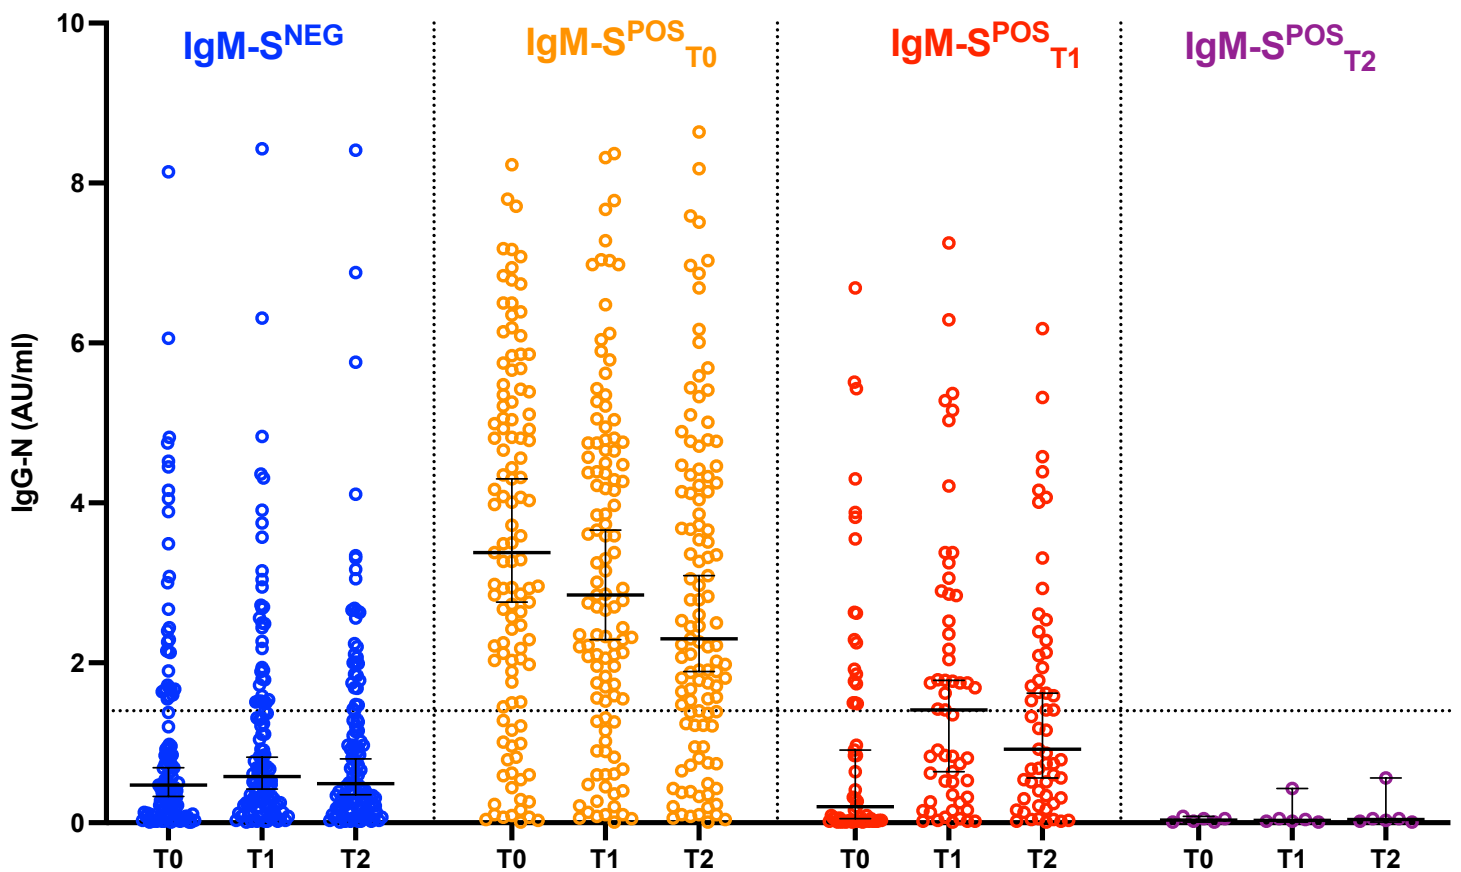

Supplement: mmc1.pdf [file mmc1.pdf]

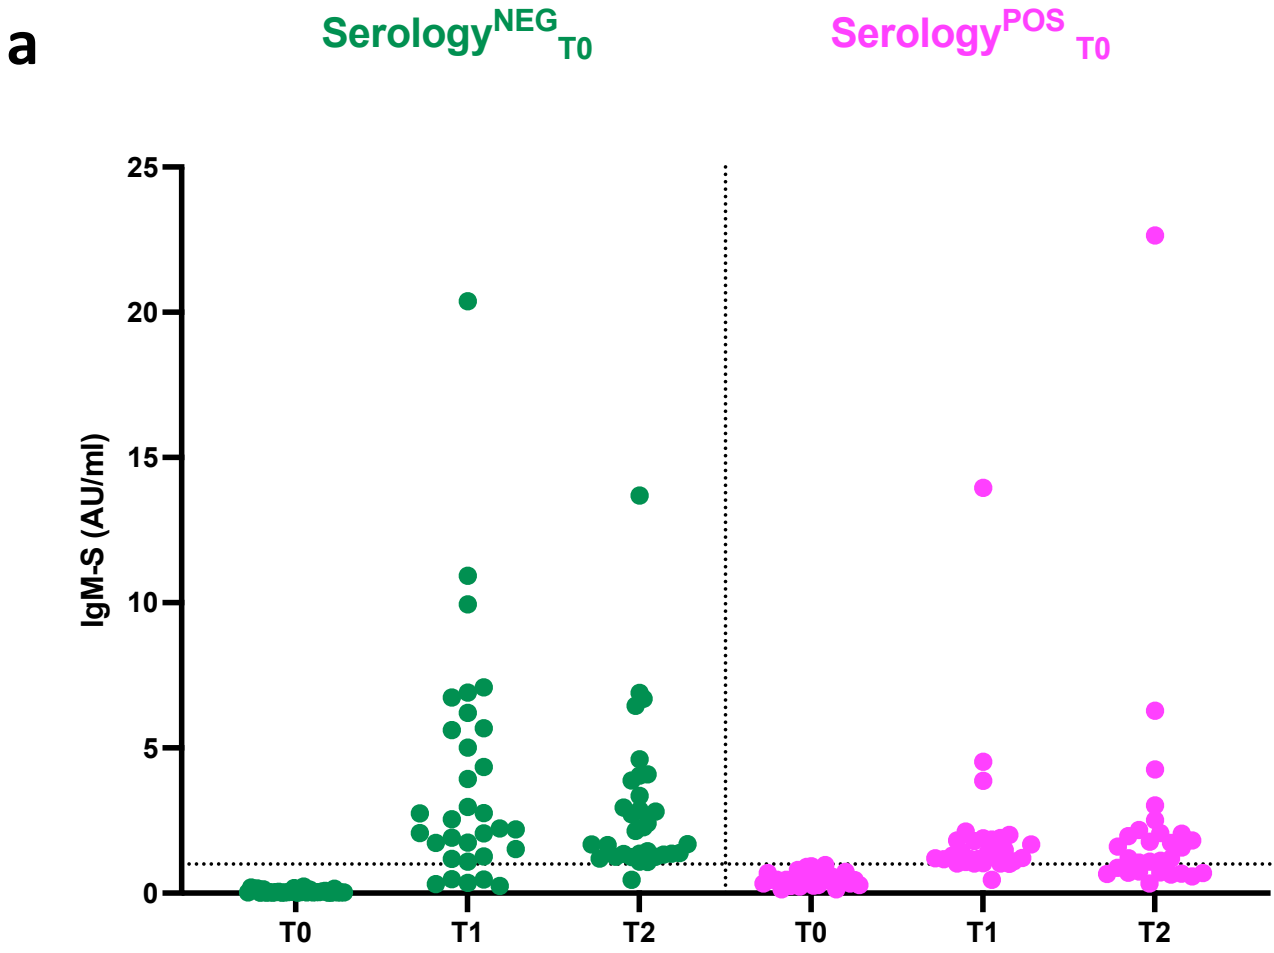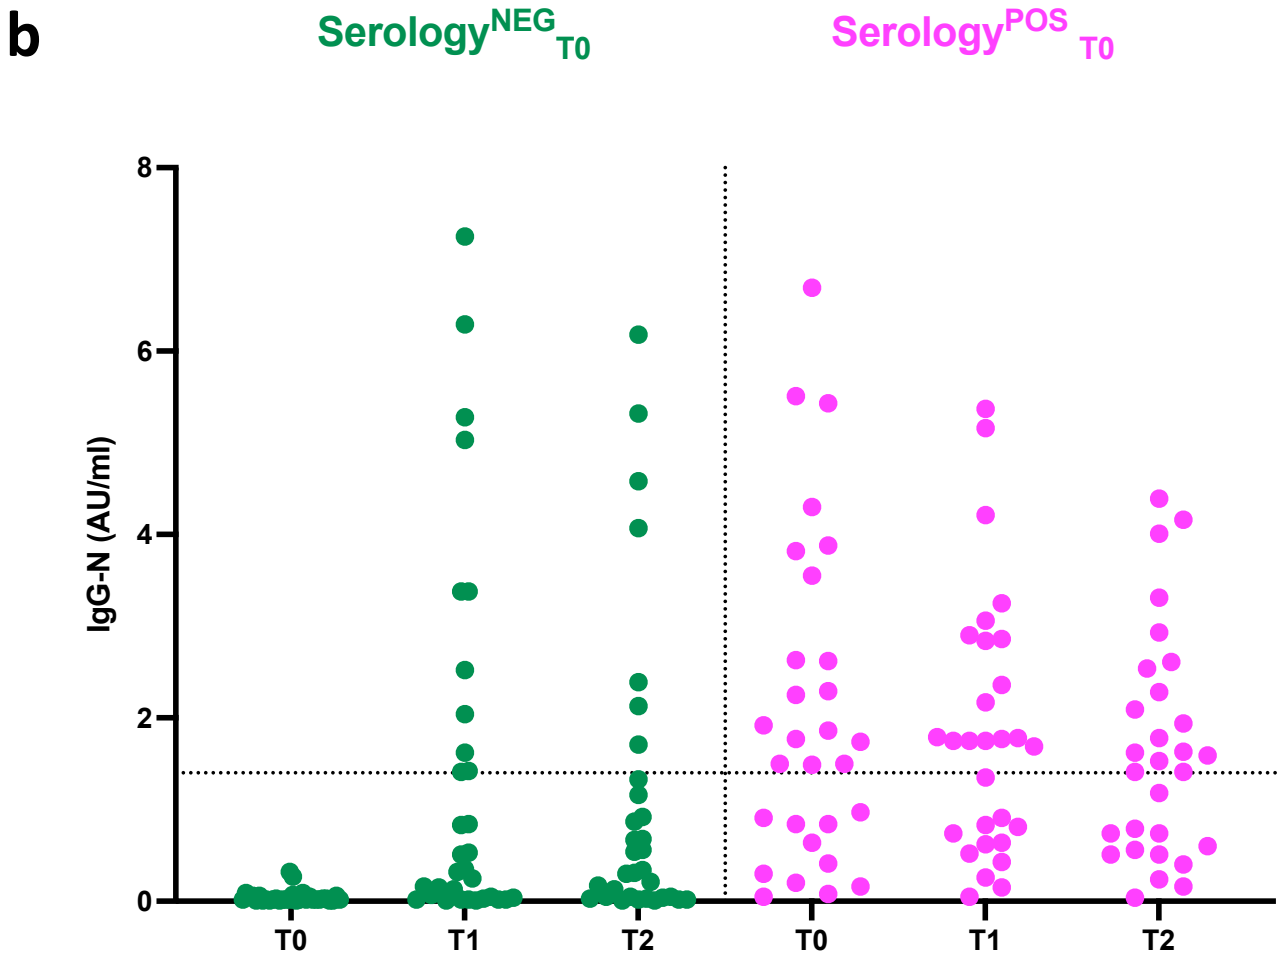

Supplement: mmc2.pdf [file mmc2.pdf]
